# Supplementary material for: Virome Profiling, New Virus Identification and the Prevalence and Distribution of Viruses Infecting Chieh-Qua (Benincasa hispida Cogn. var. chieh-qua How) in China
Source: MDPI journal article supplement (doi:10.3390/v15061396), 2023-06-19
Supplement: s1 [file s1]

**Table S1.** Specific primers used to confirm the presence of the virus in the original plants and to survey virus prevalence

| Virus                                                                                                | Accession No. | Primer <sup>a</sup> | Sequences (5'-3')      | Expected Size(bp) | Annealing Temperature (°C) | Reference  |
|------------------------------------------------------------------------------------------------------|---------------|---------------------|------------------------|-------------------|----------------------------|------------|
| cucurbit chlorotic virus<br>(CuCV, genus <i>Crinivirus</i> , family <i>Closteroviridae</i> )         | OP976048      | CuCV-RNA1-F         | CCTCTCATCCTCTTTTACCG   | 550               | 53                         | this study |
|                                                                                                      |               | CuCV-RNA1-R         | TAACCGTCACCATACTAGT    |                   |                            |            |
|                                                                                                      | OP976049      | CuCV-RNA2-F         | GTGGGCTAATTTGAGAGGAA   | 528               | 55                         | this study |
|                                                                                                      |               | CuCV-RNA2-R         | AAACGTGGTCTCTTAATGCT   |                   |                            |            |
| cucurbit chlorotic yellows virus<br>(CCYV, genus <i>Crinivirus</i> , family <i>Closteroviridae</i> ) | MH477611      | CCYV-RNA1-F         | TGTTAGATTTTCCGCTGACA   | 697               | 55                         | this study |
|                                                                                                      |               | CCYV-RNA1-R         | TACACTTTGTCCACCTTAGC   |                   |                            |            |
| watermelon silver mottle virus<br>(WSMoV, genus <i>Orthospovirus</i> , family <i>Tospoviridae</i> )  | JX177647      | WSMoV-L-F           | ATAGAYGGGCARCCYTTCTT   | 1001              | 55                         | this study |
|                                                                                                      |               | WSMoV-L-R           | AGRCTGCTTCTGARTGACCT   |                   |                            |            |
| melon yellow spot virus<br>(MYSV, genus <i>Orthospovirus</i> , family <i>Tospoviridae</i> )          | MH734110      | MYSV-L-F            | TATYGGCATGGGRAAGAAAA   | 732               | 55                         | this study |
|                                                                                                      |               | MYSV-L-R            | AGAATAGGAACCTTGCTTGG   |                   |                            |            |
| papaya ringspot virus<br>(PRSV, genus <i>Potyvirus</i> , family <i>Potyviridae</i> )                 | AY027810      | PRSV-F              | GCCTGAGCGATTRTAYARRG   | 928               | 55                         | this study |
|                                                                                                      |               | PRSV-R              | CTGTGCGATCRAARCTGTCHG  |                   |                            |            |
| chieh-qua endornavirus<br>(CqEV genus <i>Alphaendornavirus</i> , family <i>Endornaviridae</i> )      | OQ851472      | CqEV-F              | TCCACAAGTAGCGGACCATT   | 582               | 55                         | this study |
|                                                                                                      |               | CqEV-R              | AATGGGTGATCGGGTCCTTT   |                   |                            |            |
| cucumber mosaic virus<br>(CMV genus <i>Cucumovirus</i> , family <i>Bromoviridae</i> )                | OP204214      | CP1                 | TTCGATAAGAAGCTTGTTTCGC | 480               | 53                         | [8]        |
|                                                                                                      |               | CP2                 | GCCGTAAGCTGGATGGACAA   |                   |                            |            |
| zucchini yellow mosaic virus<br>(ZYMV, genus <i>Potyvirus</i> , family <i>Potyviridae</i> )          | MN598579      | ZP1                 | TCAGGCACTCAGCCAAGTGTG  | 840               | 53                         | [8]        |
|                                                                                                      |               | ZP2                 | TTACTGCATTGTATTACACCT  |                   |                            |            |
| zucchini tigre mosaic virus<br>(ZTMV, genus <i>Potyvirus</i> , family <i>Potyviridae</i> )           | MF362994      | ZTMVdF              | GCATTAAGTTTACGACAGCGC  | 632               | 53                         | [10]       |
|                                                                                                      |               | ZTMVdR              | CAATCACTCTTGTCRGTGTC   |                   |                            |            |

<sup>a</sup> Two Primers (CuCV-RNA2-F and CuCV-RNA2-R) were only used in HTS validation, other primers were used in HTS validation and the prevalence survey of chieh-qua-associated virus

Y=C/T, R=A/G, H=A/C/T

**Table S2.** Primers used to complete the genomes of the new viruses

| Virus                                        | Primer          | Sequences<br>(5'-3')                              | Position  | Expected Size<br>(bp) | Annealing<br>Temperature<br>(°C) | Usage                   |
|----------------------------------------------|-----------------|---------------------------------------------------|-----------|-----------------------|----------------------------------|-------------------------|
| cucurbit chlorotic virus<br>(RNA1, OP976048) | CuCV-RNA1-GSP5  | CTAAAAGCCCTAGGAGAGACTACG                          | 320–297   | 320-                  | 60                               | 5' terminal of RNA1     |
|                                              | UPM             | CTAATACGACTCACTATAGGGCAA<br>GCAGTGGTATCAACGCAGAGT | —         |                       |                                  |                         |
|                                              | CuCV-RNA1-F1    | GAAGAACTCTGACTACACAA                              | 33–52     |                       |                                  |                         |
|                                              | CuCV-RNA1-R1    | GATAGGGTTGTCGTA CTTC                              | 5874–5855 | 5842                  | 51                               | complete genome of RNA1 |
|                                              | CuCV-RNA1-F2    | GCTAAGGTTGACAGGTTGTA                              | 5338–5357 | 3667                  | 53                               | complete genome of RNA1 |
|                                              | CuCV-RNA1-R2    | CTCAGAGACAGAACTATAATCA                            | 9004–8982 |                       |                                  |                         |
|                                              | CuCV-RNA1-F3    | GGTTTGGTTGTGAAAGCTTA                              | 8845–8864 | 313                   | 51                               | 3' terminal of RNA1     |
|                                              | anchored-dt-rev | TGTGTTGGGTGTGTTTGG                                | —         |                       |                                  |                         |
| cucurbit chlorotic virus<br>(RNA2, OP976049) | CuCV-RNA2-GSP5  | CATATTAATCTCAGTCCTCGATACC                         | 438–414   | 172                   | 57                               | 5' terminal of RNA2     |
|                                              | UPM             | CTAATACGACTCACTATAGGGCAA<br>GCAGTGGTATCAACGCAGAGT | —         |                       |                                  |                         |
|                                              | CuCV-RNA1-F1    | TGGTATCGAGGACTGAGATT                              | 147–166   |                       |                                  |                         |
|                                              | CuCV-RNA1-R1    | GTGGTGGAATATTGGACTGT                              | 3844–3825 | 3698                  | 53                               | complete genome of RNA2 |
|                                              | CuCV-RNA1-F2    | AACCTGAGATGCAACATCTT                              | 2541–2560 | 5230                  | 53                               | complete genome of RNA2 |
|                                              | CuCV-RNA1-R2    | ACTAAGTTCTCAAGGTGTACC                             | 7770–7750 |                       |                                  |                         |
|                                              | CuCV-RNA2-F3    | ACGGATTTGGTAAGA AACT                              | 7339–7358 | 450                   | 51                               | 3' terminal of RNA2     |
|                                              | anchored-dt-rev | TGTGTTGGGTGTGTTTGG                                | —         |                       |                                  |                         |

Table S3. RT-PCR confirmation of the presence of the virus in individual plants

| <b>Virus</b>                     | <b>CS-1</b> | <b>CS-15</b> | <b>CS-16</b> | <b>CS-37</b> | <b>CS-78</b> |
|----------------------------------|-------------|--------------|--------------|--------------|--------------|
| cucurbit chlorotic virus         | -           | +            | -            | +            | -            |
| cucurbit chlorotic yellows virus | +           | +            | -            | +            | -            |
| watermelon silver mottle virus   | +           | +            | -            | -            | -            |
| melon yellow spot virus          | +           | +            | +            | +            | +            |
| papaya ringspot virus            | -           | +            | -            | -            | -            |
| chieh-qua endornavirus           | -           | +            | +            | -            | -            |

“+” indicated virus was detected in the sample, “-” indicated no virus was detected in the sample. The presence of cucurbit chlorotic virus, cucurbit chlorotic yellows virus, watermelon silver mottle virus, melon yellow spot virus, papaya ringspot virus, and chieh-qua endornavirus were confirm by specific primers CuCV-RNA1-F/CuCV-RNA1-R and CuCV-RNA2-F/CuCV-RNA2-R, CCYV-RNA1-F/CCYV-RNA1-R, WSMoV-L-F/WSMoV-L-R, MYSV-L-F/MYSV-L-R, PRSV-F/PRSV-R, and CqEV-F/CqEV-R in Table S1, respectively.

Table S4. The percent amino acid identity RdRP, HSP70, and CP between the cucurbit chlorotic virus (CuCV) and other unclassified and formal members in the genus *Crinivirus* of the family *Closteroviridae*

| <b>Virus</b>                            | <b>Accession</b>                         | <b>RdRP</b> | <b>HSP70</b> | <b>CP</b> |
|-----------------------------------------|------------------------------------------|-------------|--------------|-----------|
| cucurbit yellow stunting disorder virus | YP_006522442, YP_006522427, YP_006522431 | 90.10       | 83.91        | 74.1      |
| lettuce chlorosis virus                 | YP_003002352, YP_003002358, YP_003002362 | 78.42       | 73.78        | 60.82     |
| bean yellow disorder virus              | YP_001816779, YP_001816775, YP_001816770 | 79.41       | 73.42        | 62.04     |
| cucurbit chlorotic yellows virus        | YP_006522442, YP_006522427, YP_006522431 | 78.22       | 73.78        | 64.08     |
| tetterwort vein chlorosis virus         | YP_009507961, YP_009507966, YP_009507970 | 73.86       | 69.80        | 62.92     |
| blackberry yellow vein-associated virus | YP_227378, YP_227360, YP_227364          | 63.96       | 63.47        | 40.66     |
| tomato chlorosis virus                  | YP_293695, YP_293699, YP_293703          | 62.10       | 58.23        | 34.89     |
| beet pseudoyellows virus                | NP_940796, NP_940788, NP_940792          | 60.79       | 62.21        | 37.55     |
| strawberry pallidosis-associated virus  | YP_003289291, YP_025085, YP_025089       | 60.00       | 62.03        | 33.47     |
| sweet potato chlorotic stunt virus      | NP_733939, NP_689401, NP_689404          | 59.21       | 60.94        | 33.06     |
| diodia vein chlorosis virus             | YP_009507950, YP_009507953, YP_009507957 | 58.02       | 63.47        | 41.32     |
| potato yellow vein virus                | YP_054415, YP_054417, YP_054421          | 55.84       | 61.48        | 41.49     |
| lettuce infectious yellows virus        | NP_619692, NP_619695, NP_619697          | 52.87       | 49.28        | 26.16     |
| tomato infectious chlorosis virus       | YP_003204952, YP_003204956, YP_003204960 | 50.69       | 52.98        | 26.12     |

**Table S5.** Overall nucleotide sequence identity (%) between chieh-qua endornavirus (CqEV) and members of different species in the genus *Alphaendornavirus* of the family *Endornaviridae*.

| <b>Virus</b>                        | <b>Accession</b> | <b>Identity (%)</b> |
|-------------------------------------|------------------|---------------------|
| cucumis melo endornavirus           | KT727022         | 65.41               |
| lagenaria siceraria endornavirus    | KF562072         | 55.01               |
| persea americana endornavirus 1     | JN880414         | 48.59               |
| yerba mate endornavirus             | KJ634409         | 50.89               |
| oryza rufipogon endornavirus        | AB014344         | 47.83               |
| oryza sativa endornavirus           | D32136           | 48.80               |
| basella alba endornavirus 1         | AB844264         | 45.82               |
| phaseolus vulgaris endornavirus 1   | KT456287         | 46.20               |
| phytophthora endornavirus 1         | AJ877914         | 38.55               |
| phaseolus vulgaris endornavirus 3   | MG242064         | 36.61               |
| agaricus bisporus endornavirus 1    | KY357509         | 38.01               |
| rhizoctonia solani endornavirus 2   | KT823701         | 36.91               |
| bell pepper endornavirus            | KX977569         | 35.30               |
| hot pepper endornavirus             | KR080326         | 35.40               |
| phaseolus vulgaris endornavirus 2   | KT456288         | 34.94               |
| winged bean endornavirus 1          | LC144945         | 34.95               |
| cluster bean endornavirus           | MG764084         | 36.29               |
| rhizoctonia cerealis endornavirus 1 | KF311065         | 35.09               |
| helianthus annuus endornavirus      | MF362666         | 36.44               |
| erysiphe cichoracearum endornavirus | KT388110         | 34.83               |
| grapevine endophyte endornavirus    | JX678977         | 33.80               |
| helicobasidium mompa endornavirus 1 | AB218287         | 33.87               |
| hordeum vulgare endornavirus        | KT721705         | 35.71               |
| vicia faba endornavirus             | AJ000929         | 34.93               |

**Table S6.** Occurrence of cucurbit chlorotic virus (CuCV) in different hosts

| <b>Location</b> | <b>Percentage of Positive Samples (No. of Virus Infected Samples/ Total no. of Plants Analyzed)</b> |                   |                 |
|-----------------|-----------------------------------------------------------------------------------------------------|-------------------|-----------------|
|                 | <b>Pumpkin</b>                                                                                      | <b>Watermelon</b> | <b>Cucumber</b> |
|                 |                                                                                                     |                   |                 |
| Chengmai        | 100 (2/2)                                                                                           | -                 | 0 (0/5)         |
| Wenchang        | 0 (0/10)                                                                                            | 0 (0/0)           | 0 (0/4)         |
| Ding'an         | -                                                                                                   | -                 | 40 (2/5)        |
| Lingshui        | -                                                                                                   | 16.67 (1/6)       | 0 (0/9)         |
| Sanya           | 40 (2/5)                                                                                            | 14.29 (1/7)       | 38.46 (5/13)    |
| Dongfang        | 0 (0/6)                                                                                             | 22.22 (2/9)       | 14.29 (1/7)     |
| Danzhou         | -                                                                                                   | -                 | 0 (0/6)         |
| Total           | 27.39 (4/23)                                                                                        | 15.38 (4/26)      | 16.33 (8/49)    |

"-" indicated no samples were collected in this region

**Table S7.** The pairwise nucleotide identities (%) of genome RNA1 among cucurbit chlorotic virus (CuCV) virus and cucurbit yellow stunting disorder virus (CYSDV) isolates available in the NCBI database.

| <b>Virus abbreviations</b> | <b>Isolates</b> | <b>Accession</b> | <b>Chieh-qua-CM</b> | <b>Thailand</b> | <b>AILM</b> | <b>14C</b> | <b>Arizona</b> | <b>CF2A-524</b> | <b>CaF2A2019</b> | <b>Spanish</b> | <b>DSMZ_PV-1144</b> |
|----------------------------|-----------------|------------------|---------------------|-----------------|-------------|------------|----------------|-----------------|------------------|----------------|---------------------|
| CuCV                       | Chieh-qua-CM    | OP976048         | 100                 |                 |             |            |                |                 |                  |                |                     |
| CuCV                       | Thailand        | MT813029         | 99.18               | 100             |             |            |                |                 |                  |                |                     |
| CYSDV                      | AILM            | AY242077         | 65.62               | 65.51           | 100         |            |                |                 |                  |                |                     |
| CYSDV                      | 14C             | MW147553         | 65.74               | 65.65           | 99.42       | 100        |                |                 |                  |                |                     |
| CYSDV                      | Arizona         | EF547827         | 65.79               | 65.70           | 99.48       | 99.81      | 100            |                 |                  |                |                     |
| CYSDV                      | CF2A-524        | MW685457         | 65.71               | 65.62           | 99.52       | 99.75      | 99.81          | 100             |                  |                |                     |
| CYSDV                      | CaF2A2019       | MW685460         | 65.76               | 65.65           | 99.55       | 99.74      | 99.80          | 99.77           | 100              |                |                     |
| CYSDV                      | Spanish         | AJ537493         | 65.70               | 65.62           | 99.53       | 99.51      | 99.56          | 99.48           | 99.58            | 100            |                     |
| CYSDV                      | DSMZ_PV-1144    | OL584359         | 65.67               | 65.62           | 99.27       | 99.33      | 99.4           | 99.34           | 99.42            | 99.34          | 100                 |

**Table S8.** The pairwise nucleotide identities (%) of genome RNA2 among cucurbit chlorotic virus (CuCV) virus and cucurbit yellow stunting disorder virus (CYSDV) isolates available in the NCBI database.

| <b>Virus abbreviations</b> | <b>Isolates</b> | <b>Accession</b> | <b>Chieh-qua-CM</b> | <b>Thailand</b> | <b>AILM</b> | <b>Arizona-1</b> | <b>CaF2A-1</b> | <b>CaF2A-2</b> | <b>DSMZ_PV-1144</b> | <b>Spanish</b> |
|----------------------------|-----------------|------------------|---------------------|-----------------|-------------|------------------|----------------|----------------|---------------------|----------------|
| CuCV                       | Chieh-qua-CM    | OP976049         | 100                 |                 |             |                  |                |                |                     |                |
| CuCV                       | Thailand        | MT819949         | 99.35               | 100             |             |                  |                |                |                     |                |
| CYSDV                      | AILM            | AY242078         | 67.44               | 67.46           | 100         |                  |                |                |                     |                |
| CYSDV                      | Arizona-1       | FJ492808         | 67.46               | 67.49           | 99.80       | 100              |                |                |                     |                |
| CYSDV                      | CaF2A-1         | MW685458         | 69.00               | 69.04           | 99.80       | 99.79            | 100            |                |                     |                |
| CYSDV                      | CaF2A-2         | MW685459         | 69.04               | 69.09           | 99.79       | 99.77            | 99.89          | 100            |                     |                |
| CYSDV                      | DSMZ_PV-1144    | OL584360         | 67.29               | 67.29           | 99.56       | 99.48            | 99.51          | 99.50          | 100                 |                |
| CYSDV                      | Spanish         | AJ439690         | 67.30               | 67.33           | 99.54       | 99.41            | 99.33          | 99.32          | 99.17               | 100            |

**Table S9.** The percent amino acid identity of RdRp (lower left) and HSP70h (upper right) among the formal species in the genus *Crinivirus* of the family *Closteroviridae*.

|       | LIYV  | TICV  | SPCSV | ToCV  | PYVV  | TwVCV | CYSDV | BYDV  | LCV   | DVCV  | SPaV  | BPYV  | BYVaV |
|-------|-------|-------|-------|-------|-------|-------|-------|-------|-------|-------|-------|-------|-------|
| LIYV  | 100   | 63.83 | 50.81 | 50.63 | 49.91 | 50.72 | 49.64 | 49.01 | 47.74 | 51.36 | 51.44 | 48.82 | 48.56 |
| TICV  | 62.57 | 100   | 52.89 | 53.43 | 53.79 | 53.07 | 53.16 | 54.51 | 53.43 | 52.17 | 52.53 | 52.71 | 53.07 |
| SPCSV | 55.45 | 53.27 | 100   | 60.83 | 61.55 | 66.06 | 61.84 | 63.72 | 63.36 | 64.26 | 63.72 | 63.54 | 63.72 |
| ToCV  | 55.75 | 55.75 | 66.67 | 100   | 57.58 | 59.93 | 60.22 | 61.01 | 59.57 | 59.39 | 60.65 | 59.75 | 58.66 |
| PYVV  | 53.47 | 56.44 | 59.80 | 60.71 | 100   | 62.27 | 61.84 | 64.26 | 64.26 | 64.26 | 64.98 | 67.51 | 67.51 |
| TwVCV | 53.27 | 51.88 | 61.39 | 61.71 | 56.83 | 100   | 71.43 | 77.52 | 78.96 | 67.45 | 64.93 | 63.18 | 63.60 |
| CYSDV | 54.44 | 51.09 | 60.40 | 62.90 | 55.84 | 74.26 | 100   | 73.60 | 73.24 | 65.28 | 63.11 | 62.57 | 64.01 |
| BYDV  | 54.58 | 51.49 | 58.22 | 61.51 | 57.03 | 76.63 | 79.49 | 100   | 83.81 | 66.73 | 66.13 | 64.44 | 63.54 |
| LCV   | 54.65 | 50.50 | 57.43 | 59.92 | 55.45 | 74.06 | 76.63 | 85.74 | 100   | 65.47 | 66.13 | 64.98 | 63.18 |
| DVCV  | 53.27 | 53.66 | 62.18 | 58.73 | 62.77 | 61.39 | 60.40 | 58.02 | 59.41 | 100   | 80.72 | 69.31 | 68.41 |
| SPaV  | 54.65 | 54.46 | 63.17 | 58.73 | 60.99 | 60.99 | 60.20 | 59.01 | 59.21 | 77.03 | 100   | 72.74 | 70.09 |
| BPYV  | 55.64 | 55.25 | 61.78 | 62.70 | 63.56 | 60.79 | 60.99 | 59.80 | 61.39 | 69.11 | 68.71 | 100   | 72.38 |
| BYVaV | 57.03 | 55.84 | 62.57 | 63.10 | 63.56 | 64.36 | 63.76 | 62.97 | 63.96 | 69.11 | 70.10 | 70.89 | 100   |

The values of the amino acid identities greater than 75% are shaded in red. The full names of the criniviruses are listed below: lettuce infectious yellows virus (LIYV, NP\_619692 and NP\_619695), tomato infectious chlorosis virus (TICV, YP\_003204952 and YP\_003204956), sweet potato chlorotic stunt virus (SPCSV, NP\_733939 and NP\_689401), tomato chlorosis virus (ToCV, YP\_293695 and YP\_293699), potato yellow vein virus (PYVV, YP\_054415 and YP\_054417), tetterwort vein chlorosis virus (TwVCV, YP\_009507961 and YP\_009507966), cucurbit yellow stunting disorder virus (CYSDV, YP\_006522442 and YP\_006522427), bean yellow disorder virus (BYDV, YP\_001816779 and YP\_001816775), lettuce chlorosis virus (LCV, YP\_003002352 and YP\_003002358), diodia vein chlorosis virus (DVCV, YP\_009507950 and YP\_009507953), strawberry pallidosis-associated virus (SPaV, YP\_003289291 and YP\_025085), beet pseudoyellows virus (BPYV, NP\_940796 and NP\_940788), blackberry yellow vein-associated virus (BYVaV, YP\_227378 and YP\_227360).

**Table S10.** Percentages of the nucleotide (Nt) and deduced protein sequence (AA) identities between CuCV (RNA1: OP976048, OP976050, OP976052, OP976054, MT813029; RNA2: OP976049, OP976051, OP976053, OP976055 and MT819949) and CYSDV (RNA1: MW147553, EF547827, MW685457, MW685460, AY242077, AJ537493 and OL584359; RNA2: FJ492808, AY242078, MW685458, MW685459, OL584360 and AJ439690) available in the NCBI database

|    | RNA1   |             |             |     |             |             |            | RNA2   |     |             |          |             |             |             |             |             |             |
|----|--------|-------------|-------------|-----|-------------|-------------|------------|--------|-----|-------------|----------|-------------|-------------|-------------|-------------|-------------|-------------|
|    | 5'-UTR | ORF1a       | RdRp        | p5  | p25         | p22         | 3'-UTR     | 5'-UTR | p4  | HSP70       | p6       | p59         | p9          | CP          | CPm         | p26         | 3'-UTR      |
| AA | N/A    | 64.79~66.21 | 89.5~90.3   | N/A | 33.33~34.3  | 44.79~46.88 | N/A        | N/A    | N/A | 82.64~84.09 | 48.15~50 | 70.08~71.43 | 51.9~53.16  | 72.51~74.50 | 55.77~56.64 | 70.18~71.49 | N/A         |
| Nt | N/A    | 65.73/66.17 | 76.61~77.21 | N/A | 49.92~50.57 | 54.13~55.18 | 59.8~65.88 | N/A    | N/A | 74.49~74.97 | 60~61.21 | 67.95~68.66 | 58.75~59.17 | 71.89~74.56 | 64.14~64.51 | 68.41~69.58 | 57.22~61.03 |
