# Supplementary material for: Virome Profiling, New Virus Identification and the Prevalence and Distribution of Viruses Infecting Chieh-Qua (Benincasa hispida Cogn. var. chieh-qua How) in China
Source: MDPI journal article supplement (doi:10.3390/v15061396), 2023-06-19
Supplement: s1 [file s1]

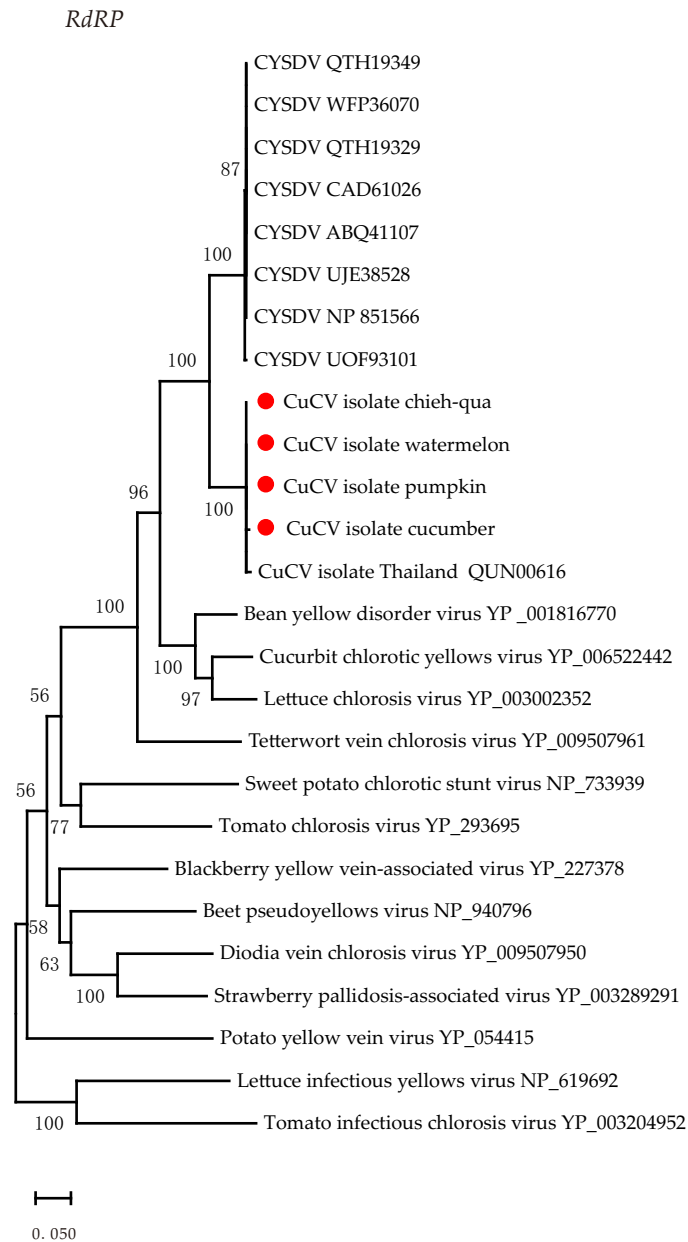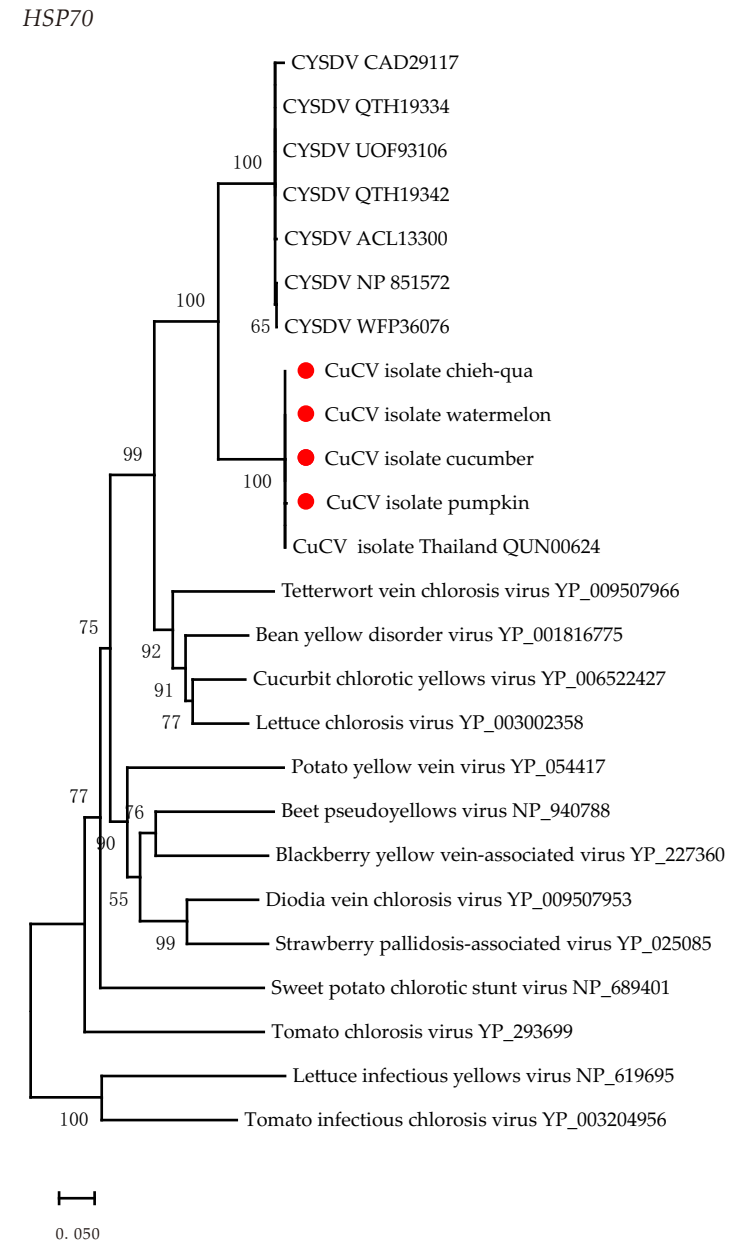

**Figure S1.** The Neighbor-joining (NJ) phylogenetic trees constructed on the RNA-dependent RNA polymerase (*RdRp*) and heat shock protein 70 (*HSP70*) gene nucleotide sequences of cucurbit chlorotic virus (CuCV), cucurbit yellow stunting disorder virus (CYSDV) and the representative members of the genus *Crinivirus*, family *Closteroviridae*. The newly identified viruses in this study are indicated by red dots.
